# Supplementary material
Source: publisher figshare collection journal article supplement (https://gsapubs.figshare.com/ndownloader/files/23294996)
Supplement: Supplementary file 1 [file 23294996]

clear
clf
[FileName,PathName,FilterIndex]=uigetfile('*.txt','Select the -ascii text file exported from ArcGIS for your DEM, should be in UTM and exported from ArcGIS using "Grid to Ascii" command');
[Z,R] = arcgridread(FileName); %read in swath of elevation data along the river. Note data should be exported from ArcGIS in ArcGrid Ascii format.  Downsampling the DEM a bit speeds things up a lot.
[FileName2,PathName,FilterIndex]=uigetfile('*.shp','Select the shapefile exported from ArcGIS that represents your thalweg, should be in UTM');
S = shaperead(FileName2);
tx = getfield(S,'X');
ty = getfield(S,'Y');
index = find((isnan(tx(:)))==0);
tx=tx(index);
ty=ty(index);
dist_intervals = inputdlg('Please enter sampling interval along the river in meters');  %channel distance averaging window
elv_intervals = inputdlg('Please enter the elevation bin size in meters'); %elevation bin size
elv_limits = inputdlg('How far above the channel bottom, in meters, would you like to map terraces?');  %channel distance averaging window
dist_intervalc = char(dist_intervals);
elv_limitc = char(elv_limits);
elv_intervalc = char(elv_intervals);
dist_interval = str2num(dist_intervalc);
elv_interval = str2num(elv_intervalc);
elv_limit = str2num(elv_limitc);

dxt = zeros(size(tx));
for i = 2:length(tx)
    dxt(i) = sqrt(((tx(i)-tx(i-1))^2)+((ty(i)-ty(i-1))^2));
end
distt = cumsum(dxt);
newd = [0:dist_interval:max(distt)];
newx = interp1(distt,tx,newd);
newy = interp1(distt,ty,newd);
PXY = zeros(length(newx),2);
PXY(:,1) = newx;
PXY(:,2) = newy;
d = R(2);  %DEM pixel resolution in meters
[row col] = size(Z); %find dimensions of DEM
xvec = [R(3,1):d:(R(3,1)+(d*(col-1)))];  %create vector of x coordinates
yvec = [R(3,2):-d:(R(3,2)-(d*(row-1)))]; %create vector of y coordinates
[X Y] = meshgrid(xvec,yvec); %create X and Y arrays
XP = zeros(size(X)); 
YP = zeros(size(Y));
DXS = zeros(size(Y));
DXSR = zeros(size(Y));
g2 = gradient(Z,d,d);
indexslope = find(g2>0.05); % find hill slope values greater than a threshold in gradient
Z(indexslope) = NaN; %throw away slopes greater than threshold

for i = 1:row
    percent_done = 100*(i/row)
    for j = 1:col
        p = [X(i,j) Y(i,j)];% define x-y coordinates of a cell in the DEM
        k = dsearchn(PXY,p); %find closest point along channel to point in DEM
        XP(i,j) = PXY(k,1); %x coordinate of closest point
        YP(i,j) = PXY(k,2); %y coordinate of closest point
        DXS(i,j) = k*100; %distance of projected point along cross-section line
        
    end
end
ZR = zeros(size(Z));
ZR = round(Z./elv_interval)*elv_interval; %round elevation to vertical elevation interval, 
zbin = (min(min(ZR))-(elv_interval/2)):elv_interval:(max(max(ZR))+(elv_interval/2)); %define elevation bins
DXSR = round(DXS./dist_interval)*dist_interval; %round downstream distance to distance interval 
dbins = 0:(dist_interval):(max(max(DXSR)))-dist_interval; %define distance bins

T = zeros(length(zbin),length(dbins));%create empty array for elevation versus distance downstream

for i = 1:1:((max(max(DXSR))/(dist_interval)))
index = find(DXSR(:,:)==((dist_interval)*i));  %find all points that correspond to a specific distance along channel
zz = ZR(index); %create vector of these elevations
minelv(i) = min(zz); %find minimum elevation of this vector
indexmt = find(zz > (minelv(i)+elv_limit)); %locate elevations above some threshold above the channel... here it is 150 m
zz(indexmt)=NaN; %make these points no data.

[n,zout] = hist(zz,zbin);  %histogram of elevations at one spot along channel
indexxx = find(isnan(zz)==0);
denom = length(indexxx);
T(:,i)=(n/denom);%normalized elevation frequency

end

figure
%plot elevation frequency as a function of channel distance downstream
pcolor(dbins,zbin,T)
shading interp
xlabel('Distance(m)')
ylabel('Elevation(m)')


[Z2,R] = arcgridread(FileName);
h = hillshade(Z2,xvec,yvec,'azimuth',45,'altitude',30);
    figure
    imagesc(xvec,yvec,h)
  
    set(gca,'ydir','normal')
    colormap(gray)
    hold on
    plot(PXY(:,1),PXY(:,2))
    xlabel('UTM Easting (m)')
    ylabel('UTM Northing(m)')
    axis image
   
    
   
